# Supplementary material
Source: PubMed Central journal article supplement (PMC8328876)

## Supplementary table 1. Sybr green primer pairs for RT-PCR

| Gene            | Forward/Reverse Primer | Primer                  |
|-----------------|------------------------|-------------------------|
| <i>Gapdh</i>    | Forward Primer         | AGGTCGGTGTGAACGGATTTG   |
|                 | Reverse Primer         | TGTAGACCATGTAGTTGAGGTCA |
| <i>Acta2</i>    | Forward Primer         | GTCCCAGACATCAGGGAGTAA   |
|                 | Reverse Primer         | TCGGATACTTCAGCGTCAGGA   |
| <i>Cyp1b1</i>   | Forward Primer         | CACCAGCCTTAGTGCAGACAG   |
|                 | Reverse Primer         | GAGGACCACGGTTTCCGTTG    |
| <i>Cldn1</i>    | Forward Primer         | GGGGACAACATCGTGACCG     |
|                 | Reverse Primer         | AGGAGTCGAAGACTTTGCACT   |
| <i>P2rx2</i>    | Forward Primer         | GCGTTCCTGGGACTACGAGAC   |
|                 | Reverse Primer         | ACGTACCACACGAAGTAAAGC   |
| <i>Fabp7</i>    | Forward Primer         | GGACACAATGCACATTCAGAAC  |
|                 | Reverse Primer         | CCGAACCACAGACTTACAGTTT  |
| <i>Slitrk1</i>  | Forward Primer         | GAAGGGGACTTACACGTAGACT  |
|                 | Reverse Primer         | AGTGAGGGGAATTGCCATGCAG  |
| <i>Ajap1</i>    | Forward Primer         | ACAGAGTTCAACGATTTGACTT  |
|                 | Reverse Primer         | GGGAAGGTGTTGGACTCCAG    |
| <i>Itga9</i>    | Forward Primer         | AAGTGTCGTGTCCATACCAAC   |
|                 | Reverse Primer         | GGTCTGCTTCGTAGTAGATGTTT |
| <i>Hsd11b2</i>  | Forward Primer         | GGTTGTGACACTGGTTTTGGC   |
|                 | Reverse Primer         | AGAACACGGCTGATGTCCTCT   |
| <i>Gfra2</i>    | Forward Primer         | CGCCTCTCGGACATCTTCAG    |
|                 | Reverse Primer         | TTGCAGTTGTCGTTCAAGTTG   |
| <i>Syn3</i>     | Forward Primer         | CAATGGCTACATGCCGGAC     |
|                 | Reverse Primer         | CCTGGGTCTTTGAACCACGG    |
| <i>Trpc6</i>    | Forward Primer         | AGCCAGGACTATTTGCTGATGG  |
|                 | Reverse Primer         | AACCTTCTTCCCTTCTCACGA   |
| <i>Astn2</i>    | Forward Primer         | GGTGGACTCATTGCACTTCTC   |
|                 | Reverse Primer         | TTGCGCTCTTCTGTGGGATG    |
| <i>Xkr4</i>     | Forward Primer         | ACTTCGCGGATGTGGGAAC     |
|                 | Reverse Primer         | CCAGCGGAAGCTGAACACTT    |
| <i>Fgf5</i>     | Forward Primer         | TGTGTCTCAGGGGATTGTAGG   |
|                 | Reverse Primer         | AGCTGTTTTCTTGAATCTCTCC  |
| <i>Tgfb1</i>    | Forward Primer         | CAGCACGGCCCCAATGTAT     |
|                 | Reverse Primer         | GGGACCTTTTCATATCCAGGACA |
| <i>Defa-rs4</i> | Forward Primer         | AACGGCCTGCTTACCTTACT    |
|                 | Reverse Primer         | ACGTGTTCAAGTTCAACCCC    |
| <i>Dpt</i>      | Forward Primer         | TGGATGGGTGAATCTTAACCGC  |
|                 | Reverse Primer         | TCAGAGCCTTCCTTCTTGCTA   |
| <i>Sytl5</i>    | Forward Primer         | GGAAGACAAGAGGATAAGGAAGC |

|                 |                       |                          |
|-----------------|-----------------------|--------------------------|
|                 | <i>Reverse Primer</i> | TTGTGACAGTGAACGCAGACT    |
| <i>Zcchc5</i>   | <i>Forward Primer</i> | TGCCCCTAGAGTACCCTTTGG    |
|                 | <i>Reverse Primer</i> | TCAGTGGGATACCCTCTGCTT    |
| <i>Pdlim3</i>   | <i>Forward Primer</i> | TGGGGGCATAGACTTCAATCA    |
|                 | <i>Reverse Primer</i> | CTCCGTACCAAAGCCATCAATAG  |
| <i>slc38a5</i>  | <i>Forward Primer</i> | CTACAGGCAGGAACGCGAAG     |
|                 | <i>Reverse Primer</i> | GGTTGAACACTGACATTCCGA    |
| <i>Enpp2</i>    | <i>Forward Primer</i> | TTTGC ACTATGCCAACAATCGG  |
|                 | <i>Reverse Primer</i> | GGAGGCACTTTAGTCCTGTA CTT |
| <i>Dubr-202</i> | <i>Forward Primer</i> | ATAGCAACGGCCTGCTTACC     |
|                 | <i>Reverse Primer</i> | GGTTCAACCCCTCGGTCTTT     |
| <i>Ampd3</i>    | <i>Forward Primer</i> | GTTGGCGGAGAAGGTGTTTG     |
|                 | <i>Reverse Primer</i> | CTGCGACCGGATCATCTTGAA    |
| <i>unc13c</i>   | <i>Forward Primer</i> | AAAGCGAACTGCAAAGTGATGA   |
|                 | <i>Reverse Primer</i> | TGCTCTCTGAAGAGTAGATCCAA  |
| <i>Aspn</i>     | <i>Forward Primer</i> | AAGGAGTATGTGATGCTACTGCT  |
|                 | <i>Reverse Primer</i> | ACATTGGCACCCAAATGGACA    |
| <i>Col6a6</i>   | <i>Forward Primer</i> | GTGGACAGCTCCGATCACCTA    |
|                 | <i>Reverse Primer</i> | GGGCGTTCCCTATCTTCAGG     |
| <i>Col6a4</i>   | <i>Forward Primer</i> | CTTCTGACAGCCGTA CTTGCC   |
|                 | <i>Reverse Primer</i> | CGAGCACGAATAATGCGATGC    |
| <i>Nrxn3</i>    | <i>Forward Primer</i> | TGGGCTGCCTTAAAGAGGTTG    |
|                 | <i>Reverse Primer</i> | GGGGTCTCAAAGTTGATGGGA    |
| <i>Gpr50</i>    | <i>Forward Primer</i> | AGAGCAACATGGGACCTACAA    |
|                 | <i>Reverse Primer</i> | GCCAGAATTTCCGAGCTTCTTG   |
| <i>Col14a1</i>  | <i>Forward Primer</i> | TTTGGCGGCTGCTTGTTTC      |
|                 | <i>Reverse Primer</i> | CGCTTTTGTTCAGTGTCTG      |
| <i>Pgm5</i>     | <i>Forward Primer</i> | TGCACCAGATGTTGTCTCAGA    |
|                 | <i>Reverse Primer</i> | CTTCCCAGTCGAGATAGGTCA    |
| <i>Nrk</i>      | <i>Forward Primer</i> | GACCTGGGAGTTGGAGGGA      |
|                 | <i>Reverse Primer</i> | CATAAGTACCAAGACCAATGGCT  |
| <i>Ano1</i>     | <i>Forward Primer</i> | CCCGTGCCAGTCACCTTTTT     |
|                 | <i>Reverse Primer</i> | TCATCTGCTTCCGTTTCCAGT    |
| <i>Col23a1</i>  | <i>Forward Primer</i> | CCCCATCTGAGTGCATCTGTC    |
|                 | <i>Reverse Primer</i> | CTTGCCGTCCAGACCTAGAG     |
| <i>Mfap4</i>    | <i>Forward Primer</i> | GCAACCCCTGGACTGTGATG     |
|                 | <i>Reverse Primer</i> | TTGTCATGTCCGAGAAGACGG    |
| <i>Enc1</i>     | <i>Forward Primer</i> | CTGTTTCATAAGTCCTCCTACGC  |
|                 | <i>Reverse Primer</i> | CACCACTGAACATGGCTTCG     |

**Supplementary table 2. The top 20 downregulated genes in the absence of *Coup-TFII* in the mesonephros.**

| Gene Symbol     | p-value (KO vs. WT) | Fold change (KO vs WT) |
|-----------------|---------------------|------------------------|
| <i>Nr2f2</i>    | 1.32E-06            | -2.51884               |
| <i>Cyp1b1</i>   | 0.000187305         | -2.24913               |
| <i>Cldn1</i>    | 0.000964991         | -1.87018               |
| <i>Amhr2</i>    | 0.00027735          | -1.84531               |
| <i>P2rx2</i>    | 0.000170114         | -1.76531               |
| <i>Fabp7</i>    | 0.00126727          | -1.76238               |
| <i>Slitrk1</i>  | 0.000666716         | -1.74521               |
| <i>Ajap1</i>    | 3.20E-05            | -1.69407               |
| <i>Itga9</i>    | 0.00109656          | -1.65097               |
| <i>Zpld1</i>    | 0.00234644          | -1.58798               |
| <i>Tm4sf5</i>   | 0.0026883           | -1.57505               |
| <i>Hsd11b2</i>  | 0.00746169          | -1.55323               |
| <i>Gfra2</i>    | 0.00339666          | -1.54512               |
| <i>Syn3</i>     | 0.000105253         | -1.53617               |
| <i>Trpc6</i>    | 0.000126465         | -1.51388               |
| <i>Astn2</i>    | 0.000237335         | -1.49525               |
| <i>Xkr4</i>     | 0.00489398          | -1.49496               |
| <i>Fgf5</i>     | 0.00143297          | -1.49425               |
| <i>Tgfb1</i>    | 0.000120038         | -1.49423               |
| <i>Defa-rs4</i> | 0.00750525          | -1.48824               |

**Supplementary table 3. The top 20 upregulated genes in the absence of *Coup-TFII* in the mesonephros.**

| Gene Symbol    | p-value(KO vs. WT) | Fold change KO vs WT |
|----------------|--------------------|----------------------|
| <i>Dpt</i>     | 0.00279629         | 3.53294              |
| <i>Sytl5</i>   | 0.00336484         | 2.20115              |
| <i>Ret</i>     | 0.00086905         | 2.13712              |
| <i>Zcchc5</i>  | 0.000359838        | 2.13014              |
| <i>Pdlim3</i>  | 1.46E-05           | 2.10404              |
| <i>Slc38a5</i> | 1.89E-06           | 2.07221              |
| <i>Enpp2</i>   | 0.00408385         | 2.0472               |
| <i>Dubr</i>    | 0.0045779          | 2.04561              |
| <i>Ampd3</i>   | 0.000446763        | 2.01873              |
| <i>Unc13c</i>  | 7.46E-05           | 1.95979              |
| <i>Aspn</i>    | 0.0473918          | 1.91231              |
| <i>Col6a6</i>  | 0.00629587         | 1.87608              |
| <i>Col6a4</i>  | 0.0305903          | 1.83411              |
| <i>Ano4</i>    | 0.000156451        | 1.79544              |
| <i>Acta2</i>   | 0.0013504          | 1.77138              |
| <i>Nrxn3</i>   | 0.00786912         | 1.77108              |
| <i>Gpr50</i>   | 0.0143848          | 1.76813              |
| <i>Col14a1</i> | 0.00350225         | 1.76605              |
| <i>Pgm5</i>    | 0.000823237        | 1.76501              |
| <i>Nrk</i>     | 0.00384636         | 1.73988              |

## Supplementary Table 4: Target molecules of top upstream regulators in the list of differentially expressed genes.

| Upstream regulators | Notes                                                                                                                                                                                                                                                                                                                                                                                                                                                                                                                                                                                                                                                |
|---------------------|------------------------------------------------------------------------------------------------------------------------------------------------------------------------------------------------------------------------------------------------------------------------------------------------------------------------------------------------------------------------------------------------------------------------------------------------------------------------------------------------------------------------------------------------------------------------------------------------------------------------------------------------------|
| TGFB1               | ACTA2,ADAM12,ADM,ADORA2B,AGTR2,AIM2,ANGPT1,ANPEP,ANXA2,AQP1,ASPN,ATXN1,BMP2,BMP6,C1R,CADM1,CCL11,CD40,Cdkn1c,CELF2,CLDN1,Clec2d (includes others),COL6A3,CXCL13,CXCR6,DCN,DES,EGFR,ELN,ENPP1,ETS1,F3,FAS,FERMT1,FGF5,FGF7,FGFR2,FN1,FXD6,GDF6,GEM,GMPR,GNA14,GPR12,GRM3,GRM7,GUCY2F,HEXB,HOXA2,HTRA1,ID4,IGFBP5,IGFBP7,INHBB,ITGA11,KITLG,KLK3,MAPK13,MFAP4,MGP,MYH11,MYOCD,P2RY1,PLAGL1,PLCB1,PLCL1,PPFIBP2,PTGER4,RHOB,RUNX1,S1PR3,SCD,SERPINF1,SLC16A9,SLC7A5,SLIT3,SPP1,SVEP1,TAGLN,TBX2,TGFBI,TGM2,THBD,THBS1,THBS2,THBS4,THY1,TLL1,TNFAIP6,TRIM9,TRPC1,VA T1L,VCAM1,VDR,WNT11,WT1                                                              |
| progesterone        | ACTA2,ADAMTS1,ADM,AEBP1,ALPL,AMPD3,AQP1,AR,BMP2,CA12,CADM1,CCNG1,CD40,Cdkn1c,CNR1,CYP1B1,EGFR,ENC1,ENPP1,ENPP2,F3,FGFR2,FN1,GREB1,HS D11B2,IGFBP5,IRS2,ITGA11,JAM2,KCNMA1,KLK3,LEPR,LGALS1,LGR5,LMO7,MME, NPY1R,PARM1,PLCL1,PRSS35,PTGER4,SCD,SPP1,ST3GAL1,TBX2,TGFBI,THBD,TN XB,TRPC1,VDR                                                                                                                                                                                                                                                                                                                                                           |
| beta-estradiol      | ACTA2,ADAMTS1,ADAMTS18,ADAMTS5,ADM,AEBP1,AGTR2,ALX4,ANGPT1,ANPEP, ANXA1,AQP1,AR,BMP2,BMP5,CA12,CACNA1D,CCNG1,CD40,CELF2,CHRM3,CLDN1, CLDN11,Clec2d (includes others),CNR1,COL6A6,COLEC12,CXCL13,CYP1B1,DCLK1,DCN,DUSP10,DUSP6,EGF R,ENC1,ENPP2,ETS1,F3,FAS,FGF7,FGFR2,FHL2,FN1,FRK,GEM,GPR12,GREB1,HSD 11B2,HTRA1,HTRA3,ID4,IGFBP5,IGFBP7,IL6ST,INHBB,IRS2,ITGA11,JAM2,KCNN3,KI TLG,KLK3,LEPR,LGR5,LMO7,MACC1,MEDAG,MGP,MME,MPPED2,NPY1R,NRIP1,NR P2,NTN1,NTRK3,PLAC1,PRKCB,PRSS35,PTGER4,PTGFR,RET,RND3,RUNX1,RYR2, SFRP2,SLC7A5,SLC8A1,SLIT2,SMOC1,SNED1,SRD5A2,SSTR4,ST8SIA1,SYNE1,THB D,THBS1,THBS4,TNFAIP6,TP53INP1,TRIB2,TRPC1,VCAM1,VDR,WNT11 |
| TNF                 | ABCD2,ACTA2,ADAMTS5,ADM,ADORA2B,AEBP1,AKR1B10,AMPD3,ANGPT1,ANPEP ,ANXA1,APCS,AQP1,AR,BMP2,BMP6,BMPER,CA12,CCL11,CD40,CDO1,CHSY3,CLD N11,CRISPLD2,CXCL13,CYP1B1,CYP27A1,DCN,DUSP10,DUSP6,EGFR,EMCN,ENPP 2,ENPP3,ETS1,EXOC3L4,F3,FAS,FERMT1,FGF5,FGFR2,FN1,FRZB,GABRA5,GEM,G FRA2,GRM3,GSDMD,HEXB,IGFBP5,IL1RL2,IRS2,KITLG,KLK3,LAMA4,LGR5,MFSD2A ,MGP,NRIP1,NTN1,OSMR,P2RX2,PDE7B,PDZD2,PTGFR,RGS5,RHOB,RND3,S1PR3, SCD,SCUBE1,SERPINB9,SERPINF1,SLC16A2,SLC8A1,SP7,SPP1,TAGLN,TGM2,THB D,THBS1,THBS2,THY1,TNFAIP6,TP53INP1,TRPC1,TRPC6,USP2,VCAM1,VDR                                                                                                |
| TWIST1              | ACTA2,ADAMTS1,AR,CCDC3,CD40,DCN,EGFL6,ENPP3,ETS1,FAS,FAT4,FGFR2,FIBI N,FN1,FREM2,IGFBP5,MFGE8,MME,OLFML3,PDZD2,SPP1,ST8SIA2,TGFBI,THBS2                                                                                                                                                                                                                                                                                                                                                                                                                                                                                                              |

**Supplementary Table 5: Mouses phenotype of putative COUP-TFII target genes with no expression information in the MGI database**

| Gene           | Expression in fetal mesonephros | Mouse phenotype in reproduction | Notes                                                 |
|----------------|---------------------------------|---------------------------------|-------------------------------------------------------|
| <i>Ampd3</i>   | Unknown                         | No                              |                                                       |
| <i>Atrnl1</i>  | Unknown                         | No                              |                                                       |
| <i>As3mt</i>   | Unknown                         | No                              |                                                       |
| <i>Camk2d</i>  | Unknown                         | No                              |                                                       |
| <i>Chsy3</i>   | Unknown                         | Yes                             | Abnormal seminal vesicle; male and female infertility |
| <i>Epb41l2</i> | Unknown                         | Yes                             | Small testis and abnormal spermatogenesis             |
| <i>Epha6</i>   | Unknown                         | Yes                             | abnormal seminal vesicle and epididymis               |
| <i>F3</i>      | Unknown                         | No                              |                                                       |
| <i>Grk5</i>    | Unknown                         | No                              |                                                       |
| <i>Ilf6st</i>  | Unknown                         | Yes                             | Implantation failure                                  |
| <i>Mme</i>     | Unknown                         | No                              |                                                       |
| <i>Palld</i>   | Unknown                         | Unknown                         |                                                       |
| <i>Rnu11</i>   | Unknown                         | Unknown                         |                                                       |
| <i>Sned1</i>   | Unknown                         | Unknown                         |                                                       |
| <i>Sulf1</i>   | Unknown                         | No                              |                                                       |
| <i>Syn3</i>    | Unknown                         | No                              |                                                       |
| <i>Tbc1d9</i>  | Unknown                         | Unknown                         |                                                       |
| <i>Them7</i>   | Unknown                         | Unknown                         |                                                       |
| <i>Trpc6</i>   | Unknown                         | No                              |                                                       |
| <i>Usp2</i>    | Unknown                         | Yes                             | Abnormal testis and reduced male fertility.           |
| <i>Xkr4</i>    | Unknown                         | Unknown                         |                                                       |

## Supplementary Table 6: Expression pattern and mouse phenotype of putative COUP-TFII target genes expressed in fetal mesonephros

| Gene           | Expression in fetal mesonephros | Mouse phenotype in reproduction | Notes<br>(There will be no notes if expression localization in the mesonephros cannot be defined) |
|----------------|---------------------------------|---------------------------------|---------------------------------------------------------------------------------------------------|
| <i>Abcd2</i>   | Yes                             | No                              |                                                                                                   |
| <i>Ano1</i>    | Yes                             | No                              | <b>Wolffian duct mesenchyme</b> and coelomic epithelium                                           |
| <i>C1galt1</i> | Yes                             | No                              |                                                                                                   |
| <i>Cacna1c</i> | Yes                             | Unknown                         |                                                                                                   |
| <i>Cadm1</i>   | Yes                             | No                              | Epithelium                                                                                        |
| <i>Cd24a</i>   | Yes                             | Yes                             |                                                                                                   |
| <i>Col23a1</i> | Yes                             | Unknown                         | <b>Wolffian duct mesenchyme</b>                                                                   |
| <i>Cyp27a1</i> | Yes                             | No                              |                                                                                                   |
| <i>Enc1</i>    | Yes                             | No                              | <b>Wolffian duct mesenchyme</b>                                                                   |
| <i>Fgfr2</i>   | Yes                             | Yes                             |                                                                                                   |
| <i>Gem</i>     | Yes                             | No                              |                                                                                                   |
| <i>Hmga2</i>   | Yes                             | Yes                             |                                                                                                   |
| <i>Kcnj8</i>   | Yes                             | No                              |                                                                                                   |
| <i>Lama1</i>   | Yes                             | unknown                         | Expressed in Wolffian duct epithelium and mesenchyme                                              |
| <i>Lama4</i>   | Yes                             | No                              |                                                                                                   |
| <i>Lsp1</i>    | Yes                             | No                              | Wolffian duct mesenchyme?                                                                         |
| <i>Man1a</i>   | Yes                             | Unknown                         | Wolffian duct epithelium?                                                                         |
| <i>Mfap4</i>   | Yes                             | No                              | <b>Wolffian duct mesenchyme</b>                                                                   |
| <i>Mybpc1</i>  | Yes                             | unknown                         | Epithelium of Wolffian and Müllerian ducts                                                        |
| <i>Nr2f2</i>   | Yes                             | Yes                             | <b>Mesenchyme</b>                                                                                 |
| <i>Slc7a5</i>  | Yes                             | Unknown                         | Epithelium?                                                                                       |
| <i>Nrip1</i>   | Yes                             | Yes                             | Epithelium                                                                                        |
| <i>Nrk</i>     | Yes                             | Yes                             |                                                                                                   |

# Supplementary figure 1

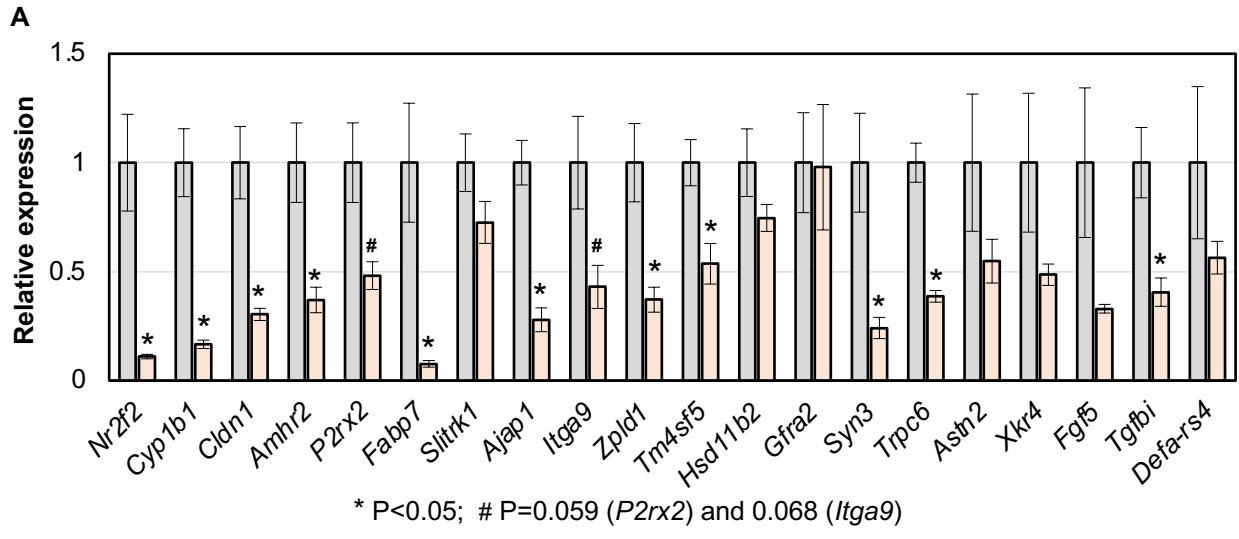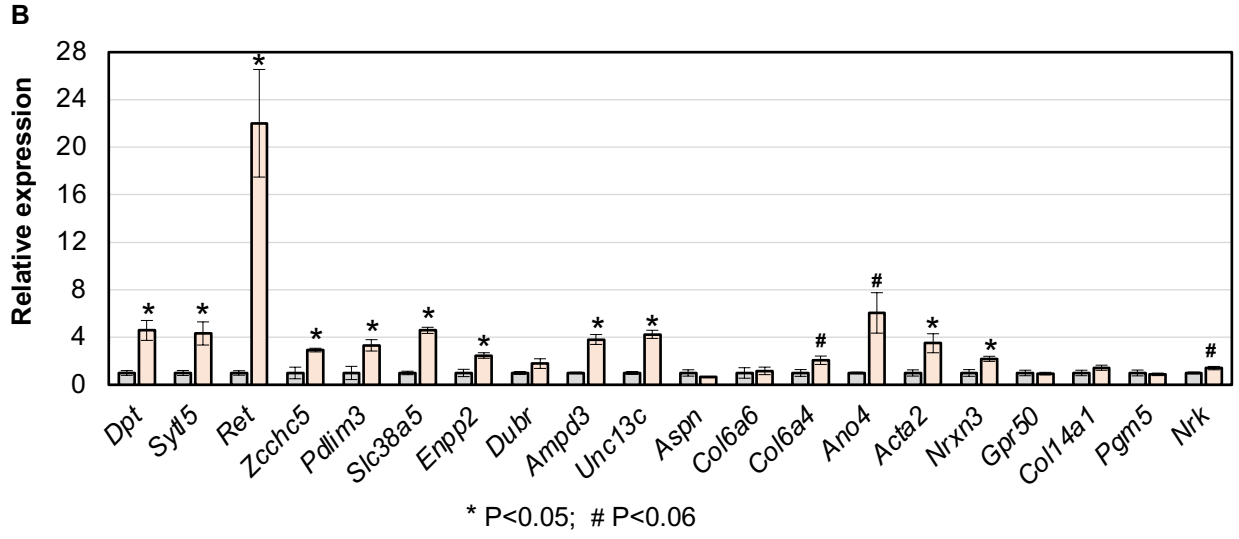



# Supplementary figure 2

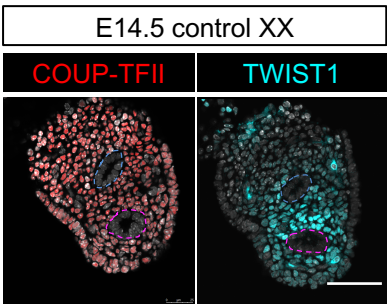

Supplement: NIHMS1668793-supplement-1.pdf [file NIHMS1668793-supplement-1.pdf]
